# Supplementary material for: Gut Microbiota Modulation of Moderate Undernutrition in Infants through Gummy Lactobacillus plantarum Dad-13 Consumption: A Randomized Double-Blind Controlled Trial
Source: MDPI journal article supplement (doi:10.3390/nu14051049), 2022-03-01
Supplement: s1 [file s1]

**TCTR ID : TCTR20220209009**

**Overall Recruitment Status : Completed (Has Results)**

**OTHER ID :**

**Retrospective registration**  
**This protocol was registered after enrollment of the first participant.**

---

**Tracking Information**

First Submitted Date : 08 February 2022  
First Posted Date : 09 February 2022  
Last Update Posted Date : 09 February 2022

---

**Title**

Public Title : Gummy Lactobacillus plantarum Dad-13 modulates gut microbiota in moderate undernutrition infants  
Acronym : No Data  
Scientific Title : Gut Microbiota Modulation of Moderate Undernutrition in In-fants through Gummy Lactobacillus plantarum Dad-13 Consumption: A Randomized Double-Blind Controlled Trial  
Sponsor ID/ IRB ID/ EC ID : 3189/UN1.DITLIT/DITLIT/PT/2020  
Registration Site : Thai Clinical Trials Registry  
URL : <https://www.thaiclinicaltrials.org/show/TCTR20220209009>  
Secondary ID : Registry Identifier; Registry : <https://ina-registry.org/> INA-DC4CNNS

---

**Ethics Review**

1. Board Approval : Submitted, approved  
Approval Number : KE/FK/1303/EC/2019  
Date of Approval : 06 November 2019  
Board Name : Medical and Health Research Ethics Committee  
Board Affiliation : Faculty of Medicine, Public Health, and Nursing, Universitas Gadjah Mada  
Board Contact : Business Phone : 274588688 Ext. +62  
Business Email : mhrec\_fmugm@ugm.ac.id  
Business Address : Jl. Farmako, Sekip Utara, Yogyakarta 55128

---

**Sponsor**

Source(s) of Monetary or Material Supports : Ministry of Research and Technology/National Research and Innovation Agency of Republic Indonesia (RISTEK-BRIN)  
Study Primary Sponsor : Ministry of Research and Technology/National Research and Innovation Agency of Republic Indonesia (RISTEK-BRIN)  
Responsible Party : Name/Official Title : Prof. Dr. Ir. Endang S Rahayu, MS  
Organization : Centre for Food and Nutrition Studies  
Phone : 274589242 Ext. +62  
Email : cfns@ugm.ac.id  
Study Secondary Sponsor : No Study Secondary Sponsor

---

**Protocol Synopsis**

Protocol Synopsis : This study is a Randomized Double-Blind Controlled Trial and was conducted to evaluate the efficacy of gummy Lactobacillus plantarum Dad-13 (108-9 CFU/3 g) to prevent the progression of severe undernutrition. This study involves two groups of moderate undernutrition infants, namely the probiotic and placebo groups, who are required to consume the product for 50 days. Before and after the research product intervention, the stool samples will be collected for gut microbiota analysis, short-chain fatty acid, and stool quality. Also will be measured for their anthropometry.

---

**URL not available**

---

**Health Conditions**

Health Condition(s) or Problem(s) Studied : moderate undernutrition  
Keywords : moderate undernutrition L. plantarum Dad-13 gut microbiota

---

**Eligibility**

Inclusion Criteria : 1. Z score cut off between -2 and -3 standard deviation  
2. not consuming probiotics, prebiotics, or antibiotics a month before the study

Gender : Both

Age Limit : Minimum : 24 Months Maximum : 60 Months

Exclusion Criteria : 1. refuse to consume research product  
2. consume other probiotic products  
3. consume antibiotic and laxative

Accept Healthy Volunteers : No

## Status

Overall Recruitment Status : Completed

|                 |                                                            |                        |
|-----------------|------------------------------------------------------------|------------------------|
| Key Trial Dates | Study Start Date (First enrollment) : 21 January 2020      | Indicate Type : Actual |
|                 | Completion Date (Last subject, Last visit) : 23 March 2020 | Indicate Type : Actual |
|                 | Study Completion Date : 23 March 2020                      | Indicate Type : Actual |

## Design

Study Type : Interventional

Primary Purpose : Prevention

Study Phase : Phase 1

Intervention Model : Parallel

Number of Arms : 2

Masking : Masked Masked Role : Allocation concealment, Subject, Caregiver, Investigator, Outcome Assessor, Statistician

Allocation : Randomized

Control : Placebo

Study Endpoint Classification : Safety/Efficacy Study

Sample size

Planned sample size : 40

Actual sample size at study completion : 40

Intervention Arm 1

Intervention name : probiotic

Intervention Type : Active Comparator

Intervention Classification : Dietary Supplement

Intervention Description : The subjects are asked to consume gummy containing L. plantarum Dad-13 (108-9 CFU/3 g) once a day. The main ingredients of gummy consist of bovine gelatin, sucrose, glucose, water, and skim milk containing L. plantarum Dad-13.

Intervention Arm 2

Intervention name : placebo

Intervention Type : Placebo Comparator

Intervention Classification : Dietary Supplement

Intervention Description : The subjects are asked to consume gummy without L. plantarum Dad-13 once a day. The main ingredients of gummy consist of bovine gelatin, sucrose, glucose, water, and skim milk without L. plantarum Dad-13.

## Outcome

### Primary Outcome

1. Outcome Name : Anthropometry

Metric / Method of measurement : body weight and body height

Time point : before-after

2. Outcome Name : Gut microbiota composition

Metric / Method of measurement : gut microbiota taxonomy and absolute number of specific bacteria

Time point : before-after

## Secondary Outcome

1. Outcome Name : Dietary intake  
Metric / Method of measurement : macro and micro nutrient intake  
Time point : during intervention period
2. Outcome Name : SCFA  
Metric / Method of measurement : SCFA concentration (Total SCFA, acetic, propionic, and butyric acid)  
Time point : before-after
3. Outcome Name : stool pH  
Metric / Method of measurement : stool pH  
Time point : before-after

## Location

### Section A : Central Contact

|                        |                       |                               |                                      |
|------------------------|-----------------------|-------------------------------|--------------------------------------|
| Central Contact        | First Name : Endang   | Middle Name : Sutriswati      | Last Name : Rahayu                   |
|                        | Degree : Prof. Dr     | Phone : 8122690013 Ext. : 62  | Email : endangsrhayu@ugm.ac.id       |
| Central Contact Backup | First Name : Maryatun | Middle Name :                 | Lastname : Maryatun                  |
|                        | Degree :              | Phone : 85643736235 Ext. : 62 | Email :<br>maria_slimshady@yahoo.com |

### Section B Facility Information and Contact

1. Site Name : Centre for Food and Nutrition Studies  
City : Sleman  
Country : Indonesia  
State/Province : Yogyakarta  
Recruitment Status : Completed  
Postal Code : 55281

|                                |                       |                               |                                      |
|--------------------------------|-----------------------|-------------------------------|--------------------------------------|
| <b>Facility Contact</b>        | First Name : Endang   | Middle Name : Sutriswati      | Last Name : Rahayu                   |
|                                | Degree : Prof. Dr     | Phone : 8122690013 Ext. : 62  | Email : endangsrhayu@ugm.ac.id       |
| <b>Facility Contact Backup</b> | First Name : Maryatun | Middle Name :                 | Last Name : Maryatun                 |
|                                | Degree :              | Phone : 85643736235 Ext. : 62 | Email :<br>maria_slimshady@yahoo.com |
| <b>Investigator Name</b>       | First Name : Rafli    | Middle Name : Zulfa           | Last Name : Kamil                    |
|                                | Degree : Dr           | Role : Site Sub-Investigator  |                                      |

### Section C : Contact for Public Queries (Responsible Person)

|                                                                  |                                              |                                |
|------------------------------------------------------------------|----------------------------------------------|--------------------------------|
| First Name : Endang                                              | Middle Name : Sutriswati                     | Last Name : Rahayu             |
| Degree : Prof. Dr                                                | Phone : 8122690013 Ext. : 62                 | Email : endangsrhayu@ugm.ac.id |
| Postal Address : Jl. Teknik Utara Barek, Yogyakarta              |                                              |                                |
| State/Province : Yogyakarta                                      | Postal Code : 55281                          |                                |
| Country : Indonesia                                              | Official Role : Study Principal Investigator |                                |
| Organization Affiliation : Centre for Food and Nutrition Studies |                                              |                                |

### Section D : Contact for Scientific Queries (Responsible Person)

|                                                                  |                                              |                                |
|------------------------------------------------------------------|----------------------------------------------|--------------------------------|
| First Name : Endang                                              | Middle Name : Sutriswati                     | Last Name : Rahayu             |
| Degree : Prof. Dr                                                | Phone : 8122690013 Ext. : 62                 | Email : endangsrhayu@ugm.ac.id |
| Postal Address : Jl. Teknik Utara Barek, Yogyakarta              |                                              |                                |
| State/Province : Yogyakarta                                      | Postal Code : 55281                          |                                |
| Country : Indonesia                                              | Official Role : Study Principal Investigator |                                |
| Organization Affiliation : Centre for Food and Nutrition Studies |                                              |                                |

## Summary Results

Date of posting of results summaries : 08 February 2022

Date of first journal publication of results : Not yet published

Baseline Characteristics : The undernourished infants were prescreened according to their location, age, and the presence of a congenital disease. The infant's parents or guardians who passed the pre-screening were socialized the research background. The parents or guardians who agreed to participate in the study signed the informed consent and assent forms for further screening. The inclusion criteria were having the Z score cut-off between -2 and -3 standard deviation and not consuming probiotics, prebiotics, or antibiotics a month before the study. 1. (Average) Age probiotic group: 37.93 months, and placebo group: 37.80 months 2. (Average) Bodyweight probiotic group: 10.84 kg, and placebo group: 11.20 kg 3. (Average) Bodyheight probiotic

group: 87.06 cm, and placebo group: 88.88 cm Both groups were categorized as moderate undernutrition

Participant Flow : Forty infants passed the screening and were allocated for this study (20 infants for each group). However, only 15 subjects in each group finished the study. Five and four subjects in the placebo and probiotic groups resigned before the study began. One subject in the probiotic group did not collect the first stool sample.

Adverse events : No data

Outcome Measures : Primary outcomes: 1. There was a better improvement of anthropometry and nutritional status in the probiotic group, compared to the placebo group, even though the delta was not significantly different between groups. 2. *L. plantarum* Dad-13 modulated the butyric acid-producing bacteria to increase and inhibit the growth of Enterobacteriaceae. The number of *L. plantarum* was increased after the probiotic intervention. However, *L. plantarum* Dad-13 was not able to change the alpha and beta diversity. Therefore, *L. plantarum* Dad-13 has been proven to promote the growth of beneficial bacteria. Secondary outcomes: 1. There were no significant changes in macronutrient and fibre intake in both groups. 2. A notable difference was observed in the probiotic group, mainly the elevation of total SCFA, propionic, and butyric acid concentration after 50 days of intervention. In addition, a significant reduction of butyric acid was observed in the placebo group. However, the changes in SCFA concentration in both groups did not alter the stool pH significantly.

Brief Summary of Results : Delta Weight (kg): Probiotic: 0.59; Placebo: 0.39. Delta height (cm): Probiotic: 1.29; placebo: 1.29. Bacteria (Log 10 cells/g): Probiotic increment *L. plantarum* (pre: 4.85; post: 5.53), decrement Enterobacteriaceae (pre: 6.27; post: 5.80). Placebo (decrement of Bifidobacterium (pre: 6.24; post: 6.07). SCFA (mmol/g): Probiotic increment total SCFA, (pre: 23.55; post: 33.78), propionic (pre: 4.43; post: 6.89), and butyric (pre: 2.62; post: 4.67).

---

#### Deidentified Individual Participant-level Data Sharing

Plan to share IPD : No

Reason : Subject's privacy concern

---

#### Publication from this study

MEDLINE Identifier : No Data

URL link to full text publication : No Data

---
