# Supplementary material for: Gut Microbiota Modulation of Moderate Undernutrition in Infants through Gummy Lactobacillus plantarum Dad-13 Consumption: A Randomized Double-Blind Controlled Trial
Source: Nutrients. 2022 Mar 1;14(5):1049. doi: 10.3390/nu14051049 (PMC8912314; doi:10.3390/nu14051049)
Supplement: Supplementary file 1 [file nutrients-14-01049-s001.zip › Supplementary data.xlsx]

## Sheet: Title
	Supplementary Data:
	Gut Microbiota Modulation of Moderate Undernutrition in Infants through Gummy Lactobacillus plantarum Dad-13 Consumption: A Randomized Double-Blind Controlled Trial
	Rafli Zulfa Kamil1,2,3,4), Agnes Murdiati1), Mohammad Juffrie5), Endang Sutriswati Rahayu1,2,3*)
	1	Department of Food and Agricultural Product Technology, Faculty of Agricultural Technology, Universitas Gadjah Mada, Jl. Flora No 1 Bulaksumur, Yogyakarta 55281, Indonesia; rafli.zulfa@gmail.com (R.Z.K.); amurdiati@ugm.ac.id (A.M.)
	2	Center for Food and Nutrition Studies, Universitas Gadjah Mada, Jl. Teknika Utara Barek, Yogyakarta 55281, Indonesia
	3	Center of Excellence for Probiotics, Universitas Gadjah Mada, Jl. Teknika Utara Barek, Yogyakarta 55281, Indonesia
	4	Department of Food Technology, Faculty of Animal and Agricultural Sciences, Universitas Diponegoro, Jl. Prof. Soedarto, Tembalang, Semarang 50275, Indonesia
	5	Faculty of Medicine, Public Health and Nursing, Universitas Gadjah Mada, Jl. Farmako, Senolowo, Sekip Utara, Yogyakarta 55281, Indonesia; mjuffrie@ugm.ac.id
	*) Corresponding author
	Correspondance email : endangsrahayu@ugm.ac.id or srahayuendang@gmail.com

## Sheet: Supp Table S1
Supplementary Table S1. MetaStats analysis of gut microbiota (phylum level)
Plc.post vs Prob.post
Taxa	mean(group1)	variance(group1)	standard error(group1)	mean(group2)	variance(group2)	standard error(group2)	p value	q value
k__Bacteria;p__Firmicutes;	0.424965	0.00253902	0.0290919	0.53668	0.00191345	0.0218715	0.01096	0.07008
k__Bacteria;p__Bacteroidetes;	0.4736	0.010387	0.0588416	0.217771	0.00193574	0.0219985	0.00536	0.07008
k__Bacteria;p__Fusobacteria;	0.000205493	6.68476e-09	4.72044e-05	0.000503155	1.2575e-08	5.60692e-05	0.00608	0.07008
k__Bacteria;p__Planctomycetes;	3.62634e-05	9.86277e-10	1.81317e-05	0.000113323	1.17805e-09	1.71614e-05	0.01024	0.07008
k__Bacteria;p__Synergistetes;	6.0439e-05	7.67104e-10	1.59907e-05	1.81317e-05	2.19173e-10	7.40224e-06	0.039	0.200571
k__Bacteria;p__Patescibacteria;	4.23073e-05	1.09586e-10	6.0439e-06	4.53293e-06	8.21897e-11	4.53293e-06	0.00144	0.05184
k__Bacteria;p__Tenericutes;	6.64829e-05	1.42462e-09	2.17916e-05	0	0	0	0.01168	0.07008
Plc.pre vs Plc.post
k__Bacteria;p__Chloroflexi;	0.00431535	2.40783e-06	0.000895885	0.000592302	6.00423e-07	0.000447371	0.0108214	0.260679
k__Bacteria;p__Armatimonadetes;	0.000126922	4.27387e-09	3.77442e-05	0	0	0	0.0215357	0.260679
k__Bacteria;p__Tenericutes;	0	0	0	6.64829e-05	1.42462e-09	2.17916e-05	0.0289643	0.260679
Others	0.000217581	8.87649e-09	5.43951e-05	0.000803839	1.0071e-07	0.000183221	0.02525	0.260679
Plc.pre vs Prob.pre
ND	ND	ND	ND	ND	ND	ND	ND	ND
Prob.pre vs Prob.post
k__Bacteria;p__Bacteroidetes;	0.333959	0.00529209	0.0363734	0.217771	0.00193574	0.0219985	0.0145185	0.261333
k__Bacteria;p__Fusobacteria;	6.3461e-05	1.61092e-08	6.3461e-05	0.000503155	1.2575e-08	5.60692e-05	0.00111111	0.04
k__Bacteria;p__Synergistetes;	0	0	0	1.81317e-05	2.19173e-10	7.40224e-06	0.0262222	0.288
k__Bacteria;p__Armatimonadetes;	7.70598e-05	3.58895e-09	2.99539e-05	4.53293e-06	8.21897e-11	4.53293e-06	0.0333333	0.288
k__Bacteria;p__Latescibacteria;	8.61256e-05	5.5615e-09	3.72877e-05	0	0	0	0.04	0.288
ND: not detected

## Sheet: Supp Table  S2
Supplementary Table S2. MetaStats analysis of gut microbiota (genus level)
Plc.post vs Prob.post
Taxa	mean(group1)	variance(group1)	standard error(group1)	mean(group2)	variance(group2)	standard error(group2)	p value	q value
k__Bacteria;p__Bacteroidetes;c__Bacteroidia;o__Bacteroidales;f__Prevotellaceae;g__Prevotella_9;	0.337238	0.0173484	0.0760448	0.14514	0.00448577	0.0334879	0.0360378	1
k__Bacteria;p__Firmicutes;c__Clostridia;o__Clostridiales;f__Ruminococcaceae;g__Faecalibacterium;	0.071856	0.000521839	0.0131889	0.153431	0.00134855	0.0183613	0.00694962	0.754054
k__Bacteria;p__Actinobacteria;c__Coriobacteriia;o__Coriobacteriales;f__Coriobacteriaceae;g__Collinsella;	0.0105647	3.45938e-05	0.00339577	0.0661445	0.000580376	0.0120455	0.00321411	0.55883
k__Bacteria;p__Firmicutes;c__Clostridia;o__Clostridiales;f__Ruminococcaceae;g__Subdoligranulum;	0.010873	5.34136e-05	0.00421954	0.0431716	0.000154409	0.00621306	0.00380101	0.55883
k__Bacteria;p__Verrucomicrobia;c__Verrucomicrobiae;o__Verrucomicrobiales;f__Akkermansiaceae;g__Akkermansia;	0.00114834	6.70778e-07	0.000472856	4.53293e-06	8.21897e-11	4.53293e-06	0.0304282	1
k__Bacteria;p__Firmicutes;c__Clostridia;o__Clostridiales;f__Lachnospiraceae;g__[Eubacterium]_hallii_group;	0.00445436	3.42019e-07	0.000337648	0.00982285	2.60078e-05	0.00254989	0.0499496	1
k__Bacteria;p__Firmicutes;c__Clostridia;o__Clostridiales;f__Lachnospiraceae;g__[Eubacterium]_ruminantium_group;	0.00035659	1.71064e-07	0.000238792	0.00306879	3.05732e-06	0.00087426	0.0145466	0.992143
k__Bacteria;p__Firmicutes;c__Clostridia;o__Clostridiales;f__Lachnospiraceae;g__[Eubacterium]_eligens_group;	0.001239	8.00966e-07	0.00051671	5.89281e-05	2.27392e-09	2.38428e-05	0.0369572	1
k__Bacteria;p__Firmicutes;c__Bacilli;o__Bacillales;f__Bacillaceae;g__Bacillus;	0	0	0	0.0014596	3.0717e-07	0.000277115	0.00170277	0.472803
k__Bacteria;p__Firmicutes;c__Bacilli;o__Lactobacillales;f__Enterococcaceae;g__Enterococcus;	1.20878e-05	1.09586e-10	6.0439e-06	0.00178144	1.84595e-06	0.000679329	0.023869	1
k__Bacteria;p__Firmicutes;c__Clostridia;o__Clostridiales;f__Ruminococcaceae;g__Ruminococcaceae_UCG-003;	7.25268e-05	8.87649e-09	5.43951e-05	0.000303706	3.09855e-08	8.80135e-05	0.0397229	1
k__Bacteria;p__Actinobacteria;c__Coriobacteriia;o__Coriobacteriales;f__Atopobiaceae;g__Olsenella;	0.000314283	2.83828e-08	9.72674e-05	0.00137801	5.84533e-07	0.000382274	0.0203123	1
k__Bacteria;p__Firmicutes;c__Clostridia;o__Clostridiales;f__Lachnospiraceae;g__Lachnospiraceae_ND3007_group;	5.43951e-05	2.30131e-09	2.76966e-05	0.00100631	9.52305e-08	0.000154297	0.00113602	0.472803
k__Bacteria;p__Proteobacteria;c__Gammaproteobacteria;o__Pseudomonadales;f__Moraxellaceae;g__Acinetobacter;	0.000598346	1.87721e-07	0.000250147	3.17305e-05	5.20535e-10	1.14076e-05	0.0386071	1
k__Bacteria;p__Firmicutes;c__Bacilli;o__Bacillales;f__Bacillaceae;g__Fictibacillus;	0	0	0	0.000326371	7.97788e-08	0.000141226	0.0360982	1
k__Bacteria;p__Actinobacteria;c__Coriobacteriia;o__Coriobacteriales;f__Eggerthellaceae;g__Slackia;	4.83512e-05	7.67104e-10	1.59907e-05	0.000426095	4.65742e-08	0.000107905	0.00829975	0.768188
k__Bacteria;p__Fusobacteria;c__Fusobacteriia;o__Fusobacteriales;f__Fusobacteriaceae;g__Cetobacterium;	0.000132966	1.52325e-08	7.12566e-05	0.000376233	1.80543e-08	6.71832e-05	0.0273778	1
k__Bacteria;p__Bacteroidetes;c__Bacteroidia;o__Bacteroidales;f__Muribaculaceae;g__gut_metagenome;	0	0	0	0.000208515	3.91223e-08	9.88968e-05	0.0478866	1
k__Bacteria;p__Proteobacteria;c__Alphaproteobacteria;o__Acetobacterales;f__Acetobacteraceae;g__Roseomonas;	0.000120878	1.42462e-09	2.17916e-05	0.000249311	9.50661e-09	4.87509e-05	0.0308035	1
k__Bacteria;p__Bacteroidetes;c__Bacteroidia;o__Cytophagales;f__Cyclobacteriaceae;g__Algoriphagus;	0.000211537	1.22737e-08	6.39627e-05	7.25268e-05	2.19173e-10	7.40224e-06	0.0442872	1
k__Bacteria;p__Firmicutes;c__Clostridia;o__Clostridiales;f__Family_XIII;g__Mogibacterium;	0.000163185	1.70955e-08	7.54883e-05	0	0	0	0.0442267	1
k__Bacteria;p__Proteobacteria;c__Deltaproteobacteria;o__Oligoflexales;f__Oligoflexaceae;g__Oligoflexus;	0.000114834	6.68476e-09	4.72044e-05	9.06585e-06	3.28759e-10	9.06585e-06	0.0417834	1
k__Bacteria;p__Actinobacteria;c__Acidimicrobiia;o__Microtrichales;f__Microtrichaceae;g__Sva0996_marine_group;	1.20878e-05	4.38345e-10	1.20878e-05	0.00010879	1.53421e-09	1.95845e-05	0.00402519	0.55883
k__Bacteria;p__Bacteroidetes;c__Bacteroidia;o__Flavobacteriales;f__Cryomorphaceae;g__uncultured;	0.00010879	2.95883e-09	3.1405e-05	2.71976e-05	1.86297e-09	2.15811e-05	0.0453728	1
k__Bacteria;p__Firmicutes;c__Clostridia;o__Clostridiales;f__Ruminococcaceae;g__DTU089;	0	0	0	8.15927e-05	3.83552e-09	3.09658e-05	0.0217758	1
k__Bacteria;p__Proteobacteria;c__Gammaproteobacteria;o__Betaproteobacteriales;f__Rhodocyclaceae;g__Sulfuritalea;	6.0439e-06	1.09586e-10	6.0439e-06	6.3461e-05	2.30131e-09	2.3986e-05	0.0355542	1
k__Bacteria;p__Tenericutes;c__Mollicutes;o__Mollicutes_RF39;f__gut_metagenome;g__gut_metagenome;	6.64829e-05	1.42462e-09	2.17916e-05	0	0	0	0.0135617	0.992143
k__Bacteria;p__Chloroflexi;c__Chloroflexia;o__Thermomicrobiales;f__JG30-KF-CM45;g__metagenome;	4.23073e-05	1.09586e-10	6.0439e-06	7.70598e-05	9.5888e-10	1.54829e-05	0.0492141	1
k__Bacteria;p__Firmicutes;c__Clostridia;o__Clostridiales;f__Christensenellaceae;g__Catabacter;	1.20878e-05	1.09586e-10	6.0439e-06	4.98622e-05	5.20535e-10	1.14076e-05	0.0154836	0.992143
k__Bacteria;p__Firmicutes;c__Erysipelotrichia;o__Erysipelotrichales;f__Erysipelotrichaceae;g__Holdemania;	3.02195e-05	7.67104e-10	1.59907e-05	7.70598e-05	5.20535e-10	1.14076e-05	0.0312846	1
k__Bacteria;p__Proteobacteria;c__Gammaproteobacteria;o__Alteromonadales;f__Alteromonadaceae;g__Alishewanella;	7.25268e-05	9.86277e-10	1.81317e-05	9.06585e-06	1.09586e-10	5.23417e-06	0.00977078	0.813906
k__Bacteria;p__Proteobacteria;c__Alphaproteobacteria;o__Caulobacterales;f__Caulobacteraceae;g__Phenylobacterium;	6.0439e-06	1.09586e-10	6.0439e-06	5.89281e-05	7.39707e-10	1.35988e-05	0.00724181	0.754054
k__Bacteria;p__Actinobacteria;c__Actinobacteria;o__Corynebacteriales;f__Dietziaceae;g__Dietzia;	0	0	0	2.71976e-05	5.47931e-10	1.1704e-05	0.0339244	1
k__Bacteria;p__Planctomycetes;c__Planctomycetacia;o__Pirellulales;f__Pirellulaceae;g__uncultured;	0	0	0	1.81317e-05	2.19173e-10	7.40224e-06	0.0287632	1
k__Bacteria;p__Bacteroidetes;c__Bacteroidia;o__Cytophagales;f__Spirosomaceae;g__Lacihabitans;	0	0	0	3.17305e-05	8.21897e-11	4.53293e-06	0.000526448	0.438531
k__Bacteria;p__Actinobacteria;c__Coriobacteriia;o__Coriobacteriales;f__Coriobacteriales_Incertae_Sedis;g__Raoultibacter;	0	0	0	1.81317e-05	2.19173e-10	7.40224e-06	0.0287632	1
Plc.pre vs Plc.post
k__Bacteria;p__Firmicutes;c__Clostridia;o__Clostridiales;f__Lachnospiraceae;g__Lachnospiraceae_NK4A136_group;	0.00311261	2.98623e-07	0.000315501	0.00965211	2.66615e-05	0.00298113	0.0454371	0.382993
k__Bacteria;p__Firmicutes;c__Bacilli;o__Lactobacillales;f__Lactobacillaceae;g__Lactobacillus;	1.81317e-05	3.28759e-10	1.04683e-05	0.00384997	9.26092e-06	0.00175698	0.0456014	0.382993
k__Bacteria;p__Firmicutes;c__Clostridia;o__Clostridiales;f__Lachnospiraceae;g__[Eubacterium]_ruminantium_group;	0.00186152	1.08271e-07	0.000189975	0.00035659	1.71064e-07	0.000238792	0.0065507	0.26712
k__Bacteria;p__Firmicutes;c__Bacilli;o__Bacillales;f__Bacillaceae;g__Bacillus;	0.00201866	2.07261e-06	0.000831185	0	0	0	0.0358322	0.382993
k__Bacteria;p__Acidobacteria;c__Acidobacteriia;o__Solibacterales;f__Solibacteraceae_(Subgroup_3);g__Candidatus_Solibacter;	0.00201262	2.09781e-06	0.000836224	0.000187361	1.05312e-07	0.000187361	0.047021	0.382993
k__Bacteria;p__Actinobacteria;c__Acidimicrobiia;o__Microtrichales;f__Ilumatobacteraceae;g__CL500-29_marine_group;	0.000265932	8.65732e-09	5.37194e-05	0.000997244	8.81074e-08	0.000171374	0.00992308	0.26712
k__Bacteria;p__Firmicutes;c__Clostridia;o__Clostridiales;f__Ruminococcaceae;g__Ruminococcaceae_UCG-003;	0.000543951	2.66295e-08	9.42151e-05	7.25268e-05	8.87649e-09	5.43951e-05	0.00822902	0.26712
k__Bacteria;p__Actinobacteria;c__Actinobacteria;o__Frankiales;f__Sporichthyaceae;g__hgcI_clade;	0	0	0	0.000670873	3.84648e-08	0.000113232	0.00341783	0.22436
k__Bacteria;p__Acidobacteria;c__Acidobacteriia;o__Solibacterales;f__Solibacteraceae_(Subgroup_3);g__Bryobacter;	0.00169229	1.09488e-06	0.000604118	9.06585e-05	2.46569e-08	9.06585e-05	0.0293164	0.372083
k__Bacteria;p__Bacteroidetes;c__Bacteroidia;o__Bacteroidales;f__Muribaculaceae;g__uncultured_Bacteroidales_bacterium;	4.83512e-05	4.38345e-10	1.20878e-05	0.000320327	1.32599e-08	6.64829e-05	0.0100874	0.26712
k__Bacteria;p__Nitrospirae;c__Nitrospira;o__Nitrospirales;f__Nitrospiraceae;g__Nitrospira;	0.00132361	1.04973e-06	0.000591531	3.02195e-05	2.73966e-09	3.02195e-05	0.0446171	0.382993
k__Bacteria;p__Actinobacteria;c__Actinobacteria;o__Micrococcales;f__Microbacteriaceae;g__Candidatus_Aquiluna;	1.20878e-05	4.38345e-10	1.20878e-05	0.000973068	3.34457e-07	0.000333895	0.0229825	0.341865
k__Bacteria;p__Actinobacteria;c__Actinobacteria;o__Corynebacteriales;f__Mycobacteriaceae;g__Mycobacterium;	0.00123296	6.71983e-07	0.00047328	0.000132966	6.68476e-09	4.72044e-05	0.0396538	0.382993
k__Bacteria;p__Firmicutes;c__Clostridia;o__Clostridiales;f__Lachnospiraceae;g__uncultured;	3.02195e-05	7.67104e-10	1.59907e-05	0.000253844	2.46569e-08	9.06585e-05	0.0356678	0.382993
k__Bacteria;p__Firmicutes;c__Clostridia;o__Clostridiales;f__Lachnospiraceae;g__Lachnospiraceae_ND3007_group;	0.00077362	2.85801e-07	0.000308654	5.43951e-05	2.30131e-09	2.76966e-05	0.0394895	0.382993
k__Bacteria;p__Actinobacteria;c__Actinobacteria;o__Propionibacteriales;f__Nocardioidaceae;g__Nocardioides;	0.000815927	1.3249e-07	0.000210151	3.02195e-05	2.73966e-09	3.02195e-05	0.0135227	0.285033
k__Bacteria;p__Firmicutes;c__Clostridia;o__Clostridiales;f__Lachnospiraceae;g__Lachnospiraceae_UCG-010;	0.000253844	1.21641e-08	6.36765e-05	6.0439e-06	1.09586e-10	6.0439e-06	0.0121521	0.281186
k__Bacteria;p__Epsilonbacteraeota;c__Campylobacteria;o__Campylobacterales;f__Helicobacteraceae;g__Helicobacter;	0	0	0	0.000163185	1.61092e-08	7.32784e-05	0.0428636	0.382993
k__Bacteria;p__Proteobacteria;c__Alphaproteobacteria;o__Rhizobiales;f__Xanthobacteraceae;g__uncultured;	0.000664829	2.1446e-07	0.00026737	6.0439e-05	1.09586e-08	6.0439e-05	0.044292	0.382993
k__Bacteria;p__Actinobacteria;c__Coriobacteriia;o__Coriobacteriales;f__Coriobacteriales_Incertae_Sedis;g__uncultured;	4.83512e-05	7.67104e-10	1.59907e-05	6.0439e-06	1.09586e-10	6.0439e-06	0.0341189	0.382993
k__Bacteria;p__Proteobacteria;c__Gammaproteobacteria;o__Pseudomonadales;f__Moraxellaceae;g__Acinetobacter;	4.83512e-05	7.01352e-09	4.83512e-05	0.000598346	1.87721e-07	0.000250147	0.046514	0.382993
k__Bacteria;p__Proteobacteria;c__Deltaproteobacteria;o__Oligoflexales;f__Oligoflexaceae;g__uncultured;	0	0	0	0.000120878	7.67104e-10	1.59907e-05	0.00188986	0.213893
k__Bacteria;p__Bacteroidetes;c__Bacteroidia;o__Bacteroidales;f__Marinifilaceae;g__Odoribacter;	7.25268e-05	3.28759e-10	1.04683e-05	0.000362634	2.76157e-08	9.5944e-05	0.0214301	0.330579
k__Bacteria;p__Verrucomicrobia;c__Verrucomicrobiae;o__uncultured;f__metagenome;g__metagenome;	0	0	0	0.000151098	1.19449e-08	6.31002e-05	0.0377552	0.382993
k__Bacteria;p__Chloroflexi;c__Anaerolineae;o__Caldilineales;f__Caldilineaceae;g__uncultured;	0.000447249	7.44091e-08	0.00015749	6.0439e-05	1.09586e-08	6.0439e-05	0.0403671	0.382993
k__Bacteria;p__Actinobacteria;c__Coriobacteriia;o__Coriobacteriales;f__Eggerthellaceae;g__Enterorhabdus;	4.23073e-05	1.42462e-09	2.17916e-05	0.000217581	5.26014e-09	4.18734e-05	0.0131871	0.285033
k__Bacteria;p__Cyanobacteria;c__Oxyphotobacteria;o__Synechococcales;f__Cyanobiaceae;g__Cyanobium_PCC-6307;	0	0	0	0.00038681	9.41346e-08	0.000177139	0.0447815	0.382993
k__Bacteria;p__Gemmatimonadetes;c__Gemmatimonadetes;o__Gemmatimonadales;f__Gemmatimonadaceae;g__Gemmatimonas;	0.000368678	1.39175e-08	6.81113e-05	0.000120878	1.06299e-08	5.95255e-05	0.0261469	0.357055
k__Bacteria;p__Proteobacteria;c__Gammaproteobacteria;o__Betaproteobacteriales;f__Burkholderiaceae;g__MWH-UniP1_aquatic_group;	0	0	0	0.00038681	3.06842e-09	3.19813e-05	0.000520979	0.144659
k__Bacteria;p__Bacteroidetes;c__Ignavibacteria;o__OPB56;f__metagenome;g__metagenome;	0	0	0	0.000350546	2.27939e-08	8.71664e-05	0.0102517	0.26712
k__Bacteria;p__Actinobacteria;c__Thermoleophilia;o__Solirubrobacterales;f__Solirubrobacteraceae;g__uncultured;	0.00052582	4.96426e-08	0.000128637	0	0	0	0.0095979	0.26712
k__Bacteria;p__Firmicutes;c__Bacilli;o__Bacillales;f__Paenibacillaceae;g__Paenibacillus;	0.000429117	3.03554e-08	0.000100591	2.41756e-05	1.75338e-09	2.41756e-05	0.0118234	0.281186
k__Bacteria;p__Proteobacteria;c__Alphaproteobacteria;o__Reyranellales;f__Reyranellaceae;g__Reyranella;	0.000308239	3.05746e-08	0.000100953	6.64829e-05	4.05469e-09	3.67636e-05	0.0421538	0.382993
k__Bacteria;p__Proteobacteria;c__Alphaproteobacteria;o__Sphingomonadales;f__Sphingomonadaceae;g__Sphingorhabdus;	0.000326371	5.65465e-08	0.000137291	0	0	0	0.0382832	0.382993
k__Bacteria;p__Proteobacteria;c__Alphaproteobacteria;o__Rhizobiales;f__Hyphomicrobiaceae;g__Pedomicrobium;	0.000320327	3.98894e-08	0.00011531	1.81317e-05	9.86277e-10	1.81317e-05	0.0301818	0.375246
k__Bacteria;p__Proteobacteria;c__Deltaproteobacteria;o__Myxococcales;f__Haliangiaceae;g__Haliangium;	0.000380766	2.20268e-08	8.56871e-05	1.20878e-05	4.38345e-10	1.20878e-05	0.00874126	0.26712
k__Bacteria;p__Firmicutes;c__Clostridia;o__Clostridiales;f__Lachnospiraceae;g__[Eubacterium]_xylanophilum_group;	6.0439e-06	1.09586e-10	6.0439e-06	0.000296151	3.39717e-09	3.3651e-05	0.00136888	0.212862
k__Bacteria;p__Acidobacteria;c__Thermoanaerobaculia;o__Thermoanaerobaculales;f__Thermoanaerobaculaceae;g__Subgroup_10;	0.000332415	2.70678e-08	9.49874e-05	1.81317e-05	9.86277e-10	1.81317e-05	0.0178951	0.309745
k__Bacteria;p__Firmicutes;c__Clostridia;o__Clostridiales;f__Clostridiaceae_1;g__Clostridium_sensu_stricto_13;	0.000296151	4.51496e-08	0.000122678	6.0439e-06	1.09586e-10	6.0439e-06	0.0384476	0.382993
k__Bacteria;p__Verrucomicrobia;c__Verrucomicrobiae;o__Chthoniobacterales;f__Chthoniobacteraceae;g__LD29;	0	0	0	0.000235712	8.87649e-09	5.43951e-05	0.00806469	0.26712
k__Bacteria;p__Proteobacteria;c__Deltaproteobacteria;o__Oligoflexales;f__0319-6G20;g__bacterium_enrichment_culture_clone_B126;	0	0	0	0.000114834	3.39717e-09	3.3651e-05	0.0168829	0.309745
k__Bacteria;p__Proteobacteria;c__Deltaproteobacteria;o__Desulfovibrionales;f__Desulfovibrionaceae;g__uncultured;	6.0439e-06	1.09586e-10	6.0439e-06	0.000145054	6.24642e-09	4.56305e-05	0.0212657	0.330579
k__Bacteria;p__Actinobacteria;c__Thermoleophilia;o__Solirubrobacterales;f__67-14;g__metagenome;	0.000181317	1.01915e-08	5.82853e-05	6.0439e-06	1.09586e-10	6.0439e-06	0.0219476	0.332406
k__Bacteria;p__Proteobacteria;c__Gammaproteobacteria;o__Oceanospirillales;f__Pseudohongiellaceae;g__Pseudohongiella;	0	0	0	0.000175273	5.36973e-09	4.23073e-05	0.00926923	0.26712
k__Bacteria;p__Proteobacteria;c__Deltaproteobacteria;o__Myxococcales;f__Polyangiaceae;g__Pajaroellobacter;	0.000259888	4.71221e-09	3.96325e-05	1.81317e-05	9.86277e-10	1.81317e-05	0.0039528	0.22436
k__Bacteria;p__Bacteroidetes;c__Bacteroidia;o__Cytophagales;f__Cyclobacteriaceae;g__Algoriphagus;	0	0	0	0.000211537	1.22737e-08	6.39627e-05	0.0173741	0.309745
k__Bacteria;p__Proteobacteria;c__Alphaproteobacteria;o__Caulobacterales;f__Hyphomonadaceae;g__Hirschia;	9.67024e-05	4.71221e-09	3.96325e-05	0	0	0	0.0350175	0.382993
k__Bacteria;p__Proteobacteria;c__Gammaproteobacteria;o__Xanthomonadales;f__Rhodanobacteraceae;g__Rhodanobacter;	4.83512e-05	1.09586e-10	6.0439e-06	6.0439e-06	1.09586e-10	6.0439e-06	0.00622028	0.26712
k__Bacteria;p__Actinobacteria;c__Actinobacteria;o__Micrococcales;f__Microbacteriaceae;g__Microbacterium;	0.000169229	1.12874e-08	6.13389e-05	2.41756e-05	1.09586e-10	6.0439e-06	0.0386119	0.382993
k__Bacteria;p__Actinobacteria;c__Acidimicrobiia;o__Microtrichales;f__Iamiaceae;g__Iamia;	0.000223624	7.01352e-09	4.83512e-05	2.41756e-05	1.75338e-09	2.41756e-05	0.0136871	0.285033
k__Bacteria;p__Actinobacteria;c__Actinobacteria;o__Corynebacteriales;f__Nocardiaceae;g__Rhodococcus;	0.000126922	6.90394e-09	4.7972e-05	0	0	0	0.0282937	0.36826
k__Bacteria;p__Firmicutes;c__Bacilli;o__Bacillales;f__Alicyclobacillaceae;g__Tumebacillus;	0.000102746	7.67104e-10	1.59907e-05	0	0	0	0.00306119	0.22436
k__Bacteria;p__Actinobacteria;c__Actinobacteria;o__Micromonosporales;f__Micromonosporaceae;g__Micromonospora;	0.000175273	5.36973e-09	4.23073e-05	0	0	0	0.00926923	0.26712
k__Bacteria;p__Actinobacteria;c__Actinobacteria;o__Frankiales;f__Nakamurellaceae;g__Nakamurella;	0.00013901	1.42462e-09	2.17916e-05	3.62634e-05	3.94511e-09	3.62634e-05	0.0359965	0.382993
k__Bacteria;p__Proteobacteria;c__Deltaproteobacteria;o__Myxococcales;f__Sandaracinaceae;g__uncultured;	0.000175273	4.71221e-09	3.96325e-05	0	0	0	0.00770804	0.26712
k__Bacteria;p__Proteobacteria;c__Gammaproteobacteria;o__Betaproteobacteriales;f__Burkholderiaceae;g__Rhizobacter;	0.000199449	2.30131e-09	2.76966e-05	0	0	0	0.0020542	0.213893
k__Bacteria;p__Actinobacteria;c__Acidimicrobiia;o__IMCC26256;f__uncultured_Ferrimicrobium_sp.;g__uncultured_Ferrimicrobium_sp.;	0.000199449	3.94511e-09	3.62634e-05	3.62634e-05	3.94511e-09	3.62634e-05	0.0182203	0.309745
k__Bacteria;p__Proteobacteria;c__Gammaproteobacteria;o__Betaproteobacteriales;f__Nitrosomonadaceae;g__Ellin6067;	0.000163185	4.27387e-09	3.77442e-05	3.02195e-05	2.73966e-09	3.02195e-05	0.025465	0.357055
k__Bacteria;p__Proteobacteria;c__Alphaproteobacteria;o__Rickettsiales;f__Rickettsiaceae;g__Candidatus_Megaira;	0	0	0	5.43951e-05	3.28759e-10	1.04683e-05	0.00430944	0.22436
k__Bacteria;p__Proteobacteria;c__Alphaproteobacteria;o__Dongiales;f__Dongiaceae;g__Dongia;	0.000120878	7.34228e-09	4.94715e-05	1.20878e-05	4.38345e-10	1.20878e-05	0.0468566	0.382993
k__Bacteria;p__Proteobacteria;c__Gammaproteobacteria;o__Betaproteobacteriales;f__Nitrosomonadaceae;g__MND1;	0.000157141	3.06842e-09	3.19813e-05	6.0439e-06	1.09586e-10	6.0439e-06	0.0070472	0.26712
k__Bacteria;p__Proteobacteria;c__Deltaproteobacteria;o__Myxococcales;f__Phaselicystidaceae;g__Phaselicystis;	9.67024e-05	1.09586e-10	6.0439e-06	0	0	0	0	0
k__Bacteria;p__Proteobacteria;c__Deltaproteobacteria;o__Oligoflexales;f__Oligoflexaceae;g__Oligoflexus;	0	0	0	0.000114834	6.68476e-09	4.72044e-05	0.0353427	0.382993
k__Bacteria;p__Actinobacteria;c__Acidimicrobiia;o__Microtrichales;f__Microtrichaceae;g__uncultured;	0.000120878	8.65732e-09	5.37194e-05	6.0439e-06	1.09586e-10	6.0439e-06	0.0473462	0.382993
k__Bacteria;p__Verrucomicrobia;c__Verrucomicrobiae;o__Chthoniobacterales;f__Chthoniobacteraceae;g__Chthoniobacter;	0.000120878	4.71221e-09	3.96325e-05	0	0	0	0.0203864	0.326574
k__Bacteria;p__Acidobacteria;c__Blastocatellia_(Subgroup_4);o__Blastocatellales;f__Blastocatellaceae;g__uncultured;	0.000163185	3.28759e-10	1.04683e-05	1.81317e-05	9.86277e-10	1.81317e-05	0.00273252	0.22436
k__Bacteria;p__Bacteroidetes;c__Bacteroidia;o__Chitinophagales;f__Chitinophagaceae;g__Ferruginibacter;	0.00010879	4.27387e-09	3.77442e-05	6.0439e-06	1.09586e-10	6.0439e-06	0.0268566	0.359635
k__Bacteria;p__Bacteroidetes;c__Bacteroidia;o__Flavobacteriales;f__Cryomorphaceae;g__uncultured;	0	0	0	0.00010879	2.95883e-09	3.1405e-05	0.0155227	0.293873
k__Bacteria;p__Bacteroidetes;c__Bacteroidia;o__Chitinophagales;f__Chitinophagaceae;g__Dinghuibacter;	0	0	0	8.46146e-05	1.42462e-09	2.17916e-05	0.0119878	0.281186
k__Bacteria;p__Chloroflexi;c__Dehalococcoidia;o__S085;f__metagenome;g__metagenome;	6.0439e-05	1.42462e-09	2.17916e-05	0	0	0	0.0249161	0.357055
k__Bacteria;p__Firmicutes;c__Clostridia;o__Clostridiales;f__Clostridiaceae_1;g__Clostridium_sensu_stricto_9;	9.06585e-05	2.30131e-09	2.76966e-05	0	0	0	0.0175385	0.309745
k__Bacteria;p__Proteobacteria;c__Gammaproteobacteria;o__Betaproteobacteriales;f__Burkholderiaceae;g__Aquabacterium;	9.06585e-05	3.94511e-09	3.62634e-05	0	0	0	0.0339545	0.382993
k__Bacteria;p__Proteobacteria;c__Alphaproteobacteria;o__Caulobacterales;f__Caulobacteraceae;g__Brevundimonas;	6.64829e-05	4.38345e-10	1.20878e-05	6.0439e-06	1.09586e-10	6.0439e-06	0.00738287	0.26712
k__Bacteria;p__Proteobacteria;c__Alphaproteobacteria;o__Sphingomonadales;f__Sphingomonadaceae;g__Sphingopyxis;	9.06585e-05	1.31504e-09	2.09367e-05	0	0	0	0.00839336	0.26712
k__Bacteria;p__Firmicutes;c__Clostridia;o__Clostridiales;f__Peptococcaceae;g__uncultured;	0	0	0	3.62634e-05	3.28759e-10	1.04683e-05	0.0155227	0.293873
k__Bacteria;p__Firmicutes;c__Clostridia;o__Clostridiales;f__Clostridiaceae_1;g__Clostridium_sensu_stricto_12;	8.46146e-05	3.39717e-09	3.3651e-05	0	0	0	0.0328899	0.382993
k__Bacteria;p__Bacteroidetes;c__Bacteroidia;o__Bacteroidales;f__Muribaculaceae;g__uncultured_Barnesiella_sp.;	0	0	0	6.64829e-05	2.08214e-09	2.63448e-05	0.0323409	0.382993
k__Bacteria;p__Bacteroidetes;c__Bacteroidia;o__Chitinophagales;f__Chitinophagaceae;g__Terrimonas;	0.000114834	1.09586e-10	6.0439e-06	6.0439e-06	1.09586e-10	6.0439e-06	0.000356643	0.144659
k__Bacteria;p__Bacteroidetes;c__Bacteroidia;o__Bacteroidales;f__Muribaculaceae;g__Muribaculum;	0	0	0	5.43951e-05	3.28759e-10	1.04683e-05	0.00430944	0.22436
k__Bacteria;p__Tenericutes;c__Mollicutes;o__Mollicutes_RF39;f__gut_metagenome;g__gut_metagenome;	0	0	0	6.64829e-05	1.42462e-09	2.17916e-05	0.0200577	0.326574
k__Bacteria;p__Firmicutes;c__Clostridia;o__Clostridiales;f__Clostridiaceae_1;g__Clostridium_sensu_stricto_10;	6.0439e-05	2.08214e-09	2.63448e-05	0	0	0	0.0400105	0.382993
k__Bacteria;p__Actinobacteria;c__Thermoleophilia;o__Gaiellales;f__uncultured;g__metagenome;	7.25268e-05	1.31504e-09	2.09367e-05	6.0439e-06	1.09586e-10	6.0439e-06	0.0200577	0.326574
k__Bacteria;p__Proteobacteria;c__Deltaproteobacteria;o__Myxococcales;f__Nannocystaceae;g__Nannocystis;	7.25268e-05	2.30131e-09	2.76966e-05	0	0	0	0.0294808	0.372083
k__Bacteria;p__Proteobacteria;c__Gammaproteobacteria;o__Betaproteobacteriales;f__Methylophilaceae;g__Candidatus_Methylopumilus;	0	0	0	7.25268e-05	3.28759e-10	1.04683e-05	0.00289685	0.22436
k__Bacteria;p__Proteobacteria;c__Gammaproteobacteria;o__Alteromonadales;f__Alteromonadaceae;g__Alishewanella;	0	0	0	7.25268e-05	9.86277e-10	1.81317e-05	0.0105822	0.26712
k__Bacteria;p__Proteobacteria;c__Gammaproteobacteria;o__Betaproteobacteriales;f__Burkholderiaceae;g__Acidovorax;	6.64829e-05	1.75338e-09	2.41756e-05	0	0	0	0.0257902	0.357055
k__Bacteria;p__Proteobacteria;c__Gammaproteobacteria;o__Alteromonadales;f__Shewanellaceae;g__Shewanella;	0	0	0	6.0439e-05	7.67104e-10	1.59907e-05	0.0126696	0.285033
k__Bacteria;p__Acidobacteria;c__Subgroup_5;o__metagenome;f__metagenome;g__metagenome;	4.23073e-05	4.38345e-10	1.20878e-05	0	0	0	0.0151661	0.293873
k__Bacteria;p__Chloroflexi;c__Anaerolineae;o__SBR1031;f__A4b;g__uncultured_soil_bacterium;	3.62634e-05	3.28759e-10	1.04683e-05	0	0	0	0.0155227	0.293873
k__Bacteria;p__Proteobacteria;c__Alphaproteobacteria;o__Caulobacterales;f__Caulobacteraceae;g__Phenylobacterium;	4.23073e-05	7.67104e-10	1.59907e-05	6.0439e-06	1.09586e-10	6.0439e-06	0.0477028	0.382993
k__Bacteria;p__Proteobacteria;c__Deltaproteobacteria;o__Myxococcales;f__uncultured;g__metagenome;	3.02195e-05	1.09586e-10	6.0439e-06	6.0439e-06	1.09586e-10	6.0439e-06	0.0238951	0.349204
k__Bacteria;p__Firmicutes;c__Clostridia;o__Clostridiales;f__Ruminococcaceae;g__Ruminococcaceae_UCG-010;	1.20878e-05	1.09586e-10	6.0439e-06	6.64829e-05	1.75338e-09	2.41756e-05	0.0449458	0.382993
k__Bacteria;p__Actinobacteria;c__Actinobacteria;o__Micromonosporales;f__Micromonosporaceae;g__Dactylosporangium;	6.0439e-05	1.09586e-10	6.0439e-06	0	0	0	0.00104371	0.212862
k__Bacteria;p__Firmicutes;c__Clostridia;o__Clostridiales;f__Lachnospiraceae;g__Anaerocolumna;	5.43951e-05	3.28759e-10	1.04683e-05	0	0	0	0.00430944	0.22436
k__Bacteria;p__Proteobacteria;c__Gammaproteobacteria;o__Gammaproteobacteria_Incertae_Sedis;f__Unknown_Family;g__uncultured;	4.83512e-05	1.09586e-10	6.0439e-06	0	0	0	0.00153322	0.212862
k__Bacteria;p__Firmicutes;c__Clostridia;o__Clostridiales;f__Lachnospiraceae;g__Anaerosporobacter;	4.23073e-05	4.38345e-10	1.20878e-05	6.0439e-06	1.09586e-10	6.0439e-06	0.0271993	0.359635
k__Bacteria;p__Firmicutes;c__Clostridia;o__Clostridiales;f__Ruminococcaceae;g__Angelakisella;	0	0	0	2.41756e-05	1.09586e-10	6.0439e-06	0.0105822	0.26712
Plc.pre vs Prob.pre
k__Bacteria;p__Firmicutes;c__Clostridia;o__Clostridiales;f__Lachnospiraceae;g__Anaerostipes;	0.00472029	1.30758e-06	0.000660198	0.00298267	4.36701e-07	0.000330417	0.0460297	1
k__Bacteria;p__Firmicutes;c__Erysipelotrichia;o__Erysipelotrichales;f__Erysipelotrichaceae;g__Erysipelotrichaceae_UCG-003;	0.00235712	5.77301e-07	0.000438672	0.000222113	3.36156e-08	9.16728e-05	0.00664007	1
k__Bacteria;p__Actinobacteria;c__Coriobacteriia;o__Coriobacteriales;f__Atopobiaceae;g__Olsenella;	0.000429117	5.1396e-08	0.000130889	0.00141881	5.63575e-07	0.000375358	0.0386327	1
k__Bacteria;p__Bacteroidetes;c__Bacteroidia;o__Bacteroidales;f__Muribaculaceae;g__uncultured_Bacteroidales_bacterium;	4.83512e-05	4.38345e-10	1.20878e-05	1.35988e-05	8.21897e-11	4.53293e-06	0.0307811	1
k__Bacteria;p__Proteobacteria;c__Deltaproteobacteria;o__RCP2-54;f__uncultured_delta_proteobacterium;g__uncultured_delta_proteobacterium;	0.000157141	3.06842e-09	3.19813e-05	5.43951e-05	1.97255e-09	2.22067e-05	0.0329147	1
k__Bacteria;p__Acidobacteria;c__Blastocatellia_(Subgroup_4);o__Blastocatellales;f__Blastocatellaceae;g__uncultured;	0.000163185	3.28759e-10	1.04683e-05	4.07963e-05	1.6164e-09	2.01022e-05	0.00485343	1
k__Bacteria;p__Actinobacteria;c__Acidimicrobiia;o__Microtrichales;f__uncultured;g__metagenome;	7.25268e-05	9.86277e-10	1.81317e-05	9.06585e-06	3.28759e-10	9.06585e-06	0.02041	1
k__Bacteria;p__Bacteroidetes;c__Bacteroidia;o__Chitinophagales;f__Chitinophagaceae;g__Terrimonas;	0.000114834	1.09586e-10	6.0439e-06	1.35988e-05	7.39707e-10	1.35988e-05	0.0022987	1
k__Bacteria;p__Firmicutes;c__Bacilli;o__Bacillales;f__Planococcaceae;g__Chryseomicrobium;	9.67024e-05	2.73966e-09	3.02195e-05	1.81317e-05	6.57518e-10	1.28211e-05	0.0436382	1
k__Bacteria;p__Firmicutes;c__Clostridia;o__Clostridiales;f__Lachnospiraceae;g__Anaerocolumna;	5.43951e-05	3.28759e-10	1.04683e-05	1.81317e-05	2.19173e-10	7.40224e-06	0.0266308	1
Prob.pre vs Prob.post
k__Bacteria;p__Bacteroidetes;c__Bacteroidia;o__Bacteroidales;f__Prevotellaceae;g__Prevotella_9;	0.298239	0.00701385	0.0418744	0.14514	0.00448577	0.0334879	0.00914829	0.330396
k__Bacteria;p__Bacteroidetes;c__Bacteroidia;o__Bacteroidales;f__Prevotellaceae;g__Prevotella_2;	0.004474	8.27626e-06	0.00143842	0.000625544	8.16527e-07	0.00045181	0.0160798	0.354266
k__Bacteria;p__Firmicutes;c__Clostridia;o__Clostridiales;f__Ruminococcaceae;g__Faecalibacterium;	0.0970953	0.00107331	0.0163807	0.153431	0.00134855	0.0183613	0.0289221	0.41346
k__Bacteria;p__Firmicutes;c__Clostridia;o__Clostridiales;f__Lachnospiraceae;g__Agathobacter;	0.0510045	0.000330234	0.00908617	0.0254297	9.814e-06	0.00156637	0.0115779	0.344444
k__Bacteria;p__Firmicutes;c__Clostridia;o__Clostridiales;f__Ruminococcaceae;g__Subdoligranulum;	0.0212322	8.22219e-05	0.00453382	0.0431716	0.000154409	0.00621306	0.00921293	0.330396
k__Bacteria;p__Firmicutes;c__Negativicutes;o__Selenomonadales;f__Veillonellaceae;g__Dialister;	0.0292827	3.90627e-05	0.00312501	0.00837685	4.51684e-05	0.00336037	0.00176996	0.210625
k__Bacteria;p__Verrucomicrobia;c__Verrucomicrobiae;o__Verrucomicrobiales;f__Akkermansiaceae;g__Akkermansia;	0.00029464	3.25197e-08	9.01661e-05	4.53293e-06	8.21897e-11	4.53293e-06	0.00597148	0.330396
k__Bacteria;p__Firmicutes;c__Negativicutes;o__Selenomonadales;f__Acidaminococcaceae;g__Phascolarctobacterium;	0.000358101	1.26545e-07	0.000177866	0.00169985	4.10373e-07	0.000320302	0.00370342	0.276895
k__Bacteria;p__Firmicutes;c__Bacilli;o__Bacillales;f__Family_XII;g__Exiguobacterium;	3.62634e-05	3.72593e-09	3.05202e-05	0.00156386	1.82732e-06	0.000675893	0.030576	0.41346
k__Bacteria;p__Firmicutes;c__Bacilli;o__Lactobacillales;f__Enterococcaceae;g__Enterococcus;	4.53293e-06	8.21897e-11	4.53293e-06	0.00178144	1.84595e-06	0.000679329	0.0143194	0.354266
k__Bacteria;p__Firmicutes;c__Clostridia;o__Clostridiales;f__Lachnospiraceae;g__[Eubacterium]_ventriosum_group;	0.000462359	2.73966e-09	2.61709e-05	0.000217581	3.30951e-08	9.09602e-05	0.0154563	0.354266
k__Bacteria;p__Firmicutes;c__Clostridia;o__Clostridiales;f__Ruminococcaceae;g__Ruminococcaceae_UCG-004;	0.00052582	5.85191e-08	0.000120954	0.0011423	1.02792e-07	0.000160306	0.00665019	0.330396
k__Bacteria;p__Firmicutes;c__Clostridia;o__Clostridiales;f__Peptococcaceae;g__Peptococcus;	0.00015412	4.04373e-08	0.000100545	0.000675406	2.29775e-07	0.000239674	0.0485475	0.485647
k__Bacteria;p__Firmicutes;c__Clostridia;o__Clostridiales;f__Lachnospiraceae;g__uncultured;	1.81317e-05	6.57518e-10	1.28211e-05	0.000802328	5.80451e-07	0.000380937	0.0433498	0.462025
k__Bacteria;p__Proteobacteria;c__Gammaproteobacteria;o__Pseudomonadales;f__Moraxellaceae;g__Acinetobacter;	0	0	0	3.17305e-05	5.20535e-10	1.14076e-05	0.0107091	0.330396
k__Bacteria;p__Proteobacteria;c__Deltaproteobacteria;o__Oligoflexales;f__Oligoflexaceae;g__uncultured;	3.17305e-05	1.83557e-09	2.14218e-05	0.00048049	1.56599e-07	0.000197863	0.0307738	0.41346
k__Bacteria;p__Firmicutes;c__Clostridia;o__Clostridiales;f__Ruminococcaceae;g__Negativibacillus;	0.000203982	1.17805e-09	1.71614e-05	0.000503155	6.40806e-08	0.000126571	0.0245475	0.386015
k__Bacteria;p__Cyanobacteria;c__Oxyphotobacteria;o__Synechococcales;f__Cyanobiaceae;g__Cyanobium_PCC-6307;	0	0	0	0.000344502	1.86297e-08	6.82453e-05	0.00120342	0.210625
k__Bacteria;p__Proteobacteria;c__Gammaproteobacteria;o__Betaproteobacteriales;f__Burkholderiaceae;g__MWH-UniP1_aquatic_group;	0	0	0	0.000439694	3.62457e-08	9.51915e-05	0.00170532	0.210625
k__Bacteria;p__Bacteroidetes;c__Ignavibacteria;o__OPB56;f__metagenome;g__metagenome;	0	0	0	0.000471424	4.55879e-08	0.000106757	0.00211597	0.220325
k__Bacteria;p__Fusobacteria;c__Fusobacteriia;o__Fusobacteriales;f__Fusobacteriaceae;g__Cetobacterium;	0	0	0	0.000376233	1.80543e-08	6.71832e-05	0.000792776	0.210625
k__Bacteria;p__Proteobacteria;c__Alphaproteobacteria;o__Rhizobiales;f__Hyphomicrobiaceae;g__Pedomicrobium;	0.000158652	1.82735e-08	6.75898e-05	4.53293e-06	8.21897e-11	4.53293e-06	0.0294449	0.41346
k__Bacteria;p__Bacteroidetes;c__Rhodothermia;o__Balneolales;f__Balneolaceae;g__CK06-06-Mud-MAS4B-21;	0	0	0	0.00026291	3.97798e-08	9.97244e-05	0.0135646	0.354266
k__Bacteria;p__Proteobacteria;c__Deltaproteobacteria;o__Myxococcales;f__Haliangiaceae;g__Haliangium;	0.00018585	3.05472e-08	8.73888e-05	0	0	0	0.0392985	0.457033
k__Bacteria;p__Acidobacteria;c__Thermoanaerobaculia;o__Thermoanaerobaculales;f__Thermoanaerobaculaceae;g__Subgroup_10;	0.000199449	1.95064e-08	6.98326e-05	0	0	0	0.00884791	0.330396
k__Bacteria;p__Proteobacteria;c__Gammaproteobacteria;o__Pseudomonadales;f__Moraxellaceae;g__Perlucidibaca;	0	0	0	0.000145054	7.89021e-09	4.44134e-05	0.0054981	0.327137
k__Bacteria;p__Bacteroidetes;c__Bacteroidia;o__Bacteroidales;f__Muribaculaceae;g__gut_metagenome;	0	0	0	0.000208515	3.91223e-08	9.88968e-05	0.0406008	0.457033
k__Bacteria;p__Verrucomicrobia;c__Verrucomicrobiae;o__Chthoniobacterales;f__Chthoniobacteraceae;g__LD29;	0	0	0	0.000167718	2.37528e-08	7.70598e-05	0.0366787	0.449314
k__Bacteria;p__Proteobacteria;c__Gammaproteobacteria;o__PLTA13;f__uncultured_gamma_proteobacterium;g__uncultured_gamma_proteobacterium;	7.70598e-05	4.90399e-09	3.50142e-05	0	0	0	0.0341597	0.44461
k__Bacteria;p__Proteobacteria;c__Alphaproteobacteria;o__Acetobacterales;f__Acetobacteraceae;g__Roseomonas;	3.17305e-05	4.0273e-09	3.17305e-05	0.000249311	9.50661e-09	4.87509e-05	0.00330798	0.275555
k__Bacteria;p__Actinobacteria;c__Thermoleophilia;o__Solirubrobacterales;f__Solirubrobacteraceae;g__Solirubrobacter;	0.000145054	1.31504e-08	5.73375e-05	1.35988e-05	7.39707e-10	1.35988e-05	0.0325913	0.430929
k__Bacteria;p__Proteobacteria;c__Gammaproteobacteria;o__Oceanospirillales;f__Pseudohongiellaceae;g__Pseudohongiella;	0	0	0	0.000163185	1.44654e-08	6.01361e-05	0.0127586	0.354266
k__Bacteria;p__Proteobacteria;c__Deltaproteobacteria;o__Myxococcales;f__Polyangiaceae;g__Pajaroellobacter;	0.00010879	1.1397e-08	5.33783e-05	0	0	0	0.0461654	0.480697
k__Bacteria;p__Bacteroidetes;c__Bacteroidia;o__Cytophagales;f__Cyclobacteriaceae;g__Algoriphagus;	0	0	0	7.25268e-05	2.19173e-10	7.40224e-06	0	0
k__Bacteria;p__Proteobacteria;c__Gammaproteobacteria;o__Vibrionales;f__Vibrionaceae;g__Vibrio;	0	0	0	3.62634e-05	6.57518e-10	1.28211e-05	0.00959316	0.330396
k__Bacteria;p__Actinobacteria;c__Acidimicrobiia;o__Microtrichales;f__Iamiaceae;g__Iamia;	0.00015412	1.50133e-08	6.12644e-05	1.81317e-05	1.31504e-09	1.81317e-05	0.0390494	0.457033
k__Bacteria;p__Bacteroidetes;c__Bacteroidia;o__Cytophagales;f__Microscillaceae;g__Chryseolinea;	7.70598e-05	5.34233e-09	3.65456e-05	0	0	0	0.0403004	0.457033
k__Bacteria;p__Actinobacteria;c__Thermoleophilia;o__Gaiellales;f__uncultured;g__uncultured_actinobacterium;	0.000126922	9.20525e-09	4.7972e-05	1.35988e-05	7.39707e-10	1.35988e-05	0.0296825	0.41346
k__Bacteria;p__Actinobacteria;c__Actinobacteria;o__Micromonosporales;f__Micromonosporaceae;g__Micromonospora;	0.000113323	1.14792e-08	5.35704e-05	0	0	0	0.0398688	0.457033
k__Bacteria;p__Bacteroidetes;c__Bacteroidia;o__Chitinophagales;f__Chitinophagaceae;g__uncultured;	0.000122389	9.28744e-09	4.81857e-05	2.26646e-05	7.39707e-10	1.35988e-05	0.049443	0.485647
k__Bacteria;p__Proteobacteria;c__Deltaproteobacteria;o__Myxococcales;f__Sandaracinaceae;g__uncultured;	0.000145054	1.29312e-08	5.68577e-05	0	0	0	0.0162034	0.354266
k__Bacteria;p__Proteobacteria;c__Gammaproteobacteria;o__Xanthomonadales;f__Rhodanobacteraceae;g__uncultured;	5.43951e-05	2.19173e-09	2.34079e-05	0	0	0	0.0259506	0.386015
k__Bacteria;p__Synergistetes;c__Synergistia;o__Synergistales;f__Synergistaceae;g__Pyramidobacter;	0	0	0	1.81317e-05	2.19173e-10	7.40224e-06	0.0199886	0.354266
k__Bacteria;p__Actinobacteria;c__Acidimicrobiia;o__IMCC26256;f__uncultured_Ferrimicrobium_sp.;g__uncultured_Ferrimicrobium_sp.;	0.00010879	8.10939e-09	4.50261e-05	0	0	0	0.022962	0.386015
k__Bacteria;p__Proteobacteria;c__Deltaproteobacteria;o__RCP2-54;f__uncultured_delta_proteobacterium;g__uncultured_delta_proteobacterium;	5.43951e-05	1.97255e-09	2.22067e-05	0	0	0	0.0194106	0.354266
k__Bacteria;p__Proteobacteria;c__Alphaproteobacteria;o__Rickettsiales;f__Rickettsiaceae;g__Candidatus_Megaira;	0	0	0	0.000135988	5.80807e-09	3.81054e-05	0.00432129	0.276895
k__Bacteria;p__Proteobacteria;c__Gammaproteobacteria;o__Betaproteobacteriales;f__Nitrosomonadaceae;g__MND1;	6.3461e-05	2.73966e-09	2.61709e-05	0	0	0	0.0224886	0.386015
k__Bacteria;p__Bacteroidetes;c__Bacteroidia;o__Sphingobacteriales;f__NS11-12_marine_group;g__uncultured_Sphingobacterium_sp.;	0	0	0	0.000126922	8.32856e-09	4.56305e-05	0.0107091	0.330396
k__Bacteria;p__Actinobacteria;c__Actinobacteria;o__Micrococcales;f__Micrococcaceae;g__Rothia;	3.17305e-05	7.39707e-10	1.35988e-05	0.000117856	6.46559e-09	4.02044e-05	0.0471274	0.484656
k__Bacteria;p__Proteobacteria;c__Gammaproteobacteria;o__Pasteurellales;f__Pasteurellaceae;g__Haemophilus;	6.3461e-05	5.47931e-10	1.1704e-05	2.71976e-05	3.28759e-10	9.06585e-06	0.0199886	0.354266
k__Bacteria;p__Actinobacteria;c__Acidimicrobiia;o__Microtrichales;f__Microtrichaceae;g__Sva0996_marine_group;	9.06585e-06	3.28759e-10	9.06585e-06	0.00010879	1.53421e-09	1.95845e-05	0.00164068	0.210625
k__Bacteria;p__Bacteroidetes;c__Bacteroidia;o__Flavobacteriales;f__Crocinitomicaceae;g__Fluviicola;	0	0	0	3.17305e-05	5.20535e-10	1.14076e-05	0.0107091	0.330396
k__Bacteria;p__Proteobacteria;c__Gammaproteobacteria;o__Betaproteobacteriales;f__SC-I-84;g__uncultured_beta_proteobacterium;	3.62634e-05	8.7669e-10	1.48045e-05	0	0	0	0.0199886	0.354266
k__Bacteria;p__Bacteroidetes;c__Bacteroidia;o__Chitinophagales;f__Saprospiraceae;g__Haliscomenobacter;	9.06585e-06	3.28759e-10	9.06585e-06	7.25268e-05	3.50676e-09	2.9609e-05	0.0438175	0.462025
k__Bacteria;p__Verrucomicrobia;c__Verrucomicrobiae;o__Chthoniobacterales;f__Terrimicrobiaceae;g__Terrimicrobium;	0	0	0	6.79939e-05	4.0273e-09	3.17305e-05	0.0380133	0.457033
k__Bacteria;p__Bacteroidetes;c__Rhodothermia;o__Balneolales;f__Balneolaceae;g__uncultured;	0	0	0	5.89281e-05	2.71226e-09	2.60397e-05	0.0300266	0.41346
k__Bacteria;p__Planctomycetes;c__Phycisphaerae;o__Phycisphaerales;f__Phycisphaeraceae;g__CL500-3;	0	0	0	6.79939e-05	2.05474e-09	2.26646e-05	0.00721673	0.330396
k__Bacteria;p__Proteobacteria;c__Gammaproteobacteria;o__Betaproteobacteriales;f__Rhodocyclaceae;g__Sulfuritalea;	4.53293e-06	8.21897e-11	4.53293e-06	6.3461e-05	2.30131e-09	2.3986e-05	0.0232624	0.386015
k__Bacteria;p__Bacteroidetes;c__Bacteroidia;o__Cytophagales;f__Microscillaceae;g__Ohtaekwangia;	3.17305e-05	9.5888e-10	1.54829e-05	0	0	0	0.0438175	0.462025
k__Bacteria;p__Chloroflexi;c__Chloroflexia;o__Thermomicrobiales;f__JG30-KF-CM45;g__metagenome;	1.35988e-05	3.01362e-10	8.67989e-06	7.70598e-05	9.5888e-10	1.54829e-05	0.00420342	0.276895
k__Bacteria;p__Proteobacteria;c__Gammaproteobacteria;o__Betaproteobacteriales;f__Methylophilaceae;g__OM43_clade;	0	0	0	6.79939e-05	2.27392e-09	2.38428e-05	0.00927757	0.330396
k__Bacteria;p__Proteobacteria;c__Deltaproteobacteria;o__Myxococcales;f__Nannocystaceae;g__Nannocystis;	2.71976e-05	5.47931e-10	1.1704e-05	0	0	0	0.0259506	0.386015
k__Bacteria;p__Proteobacteria;c__Gammaproteobacteria;o__Betaproteobacteriales;f__Methylophilaceae;g__Candidatus_Methylopumilus;	0	0	0	6.79939e-05	2.27392e-09	2.38428e-05	0.00927757	0.330396
k__Bacteria;p__Firmicutes;c__Erysipelotrichia;o__Erysipelotrichales;f__Erysipelotrichaceae;g__Holdemania;	2.71976e-05	5.47931e-10	1.1704e-05	7.70598e-05	5.20535e-10	1.14076e-05	0.00676046	0.330396
k__Bacteria;p__Firmicutes;c__Bacilli;o__Bacillales;f__Paenibacillaceae;g__Cohnella;	4.53293e-05	1.86297e-09	2.15811e-05	0	0	0	0.0414905	0.460821
k__Bacteria;p__Proteobacteria;c__Gammaproteobacteria;o__Betaproteobacteriales;f__Burkholderiaceae;g__Limnobacter;	0	0	0	4.98622e-05	1.6164e-09	2.01022e-05	0.0180038	0.354266
k__Bacteria;p__Proteobacteria;c__Alphaproteobacteria;o__Caulobacterales;f__Caulobacteraceae;g__Phenylobacterium;	4.53293e-06	8.21897e-11	4.53293e-06	5.89281e-05	7.39707e-10	1.35988e-05	0.00307605	0.275555
k__Bacteria;p__Proteobacteria;c__Deltaproteobacteria;o__Myxococcales;f__Polyangiaceae;g__Sorangium;	4.07963e-05	1.39723e-09	1.86897e-05	0	0	0	0.0355875	0.449157
k__Bacteria;p__Actinobacteria;c__Actinobacteria;o__Kineosporiales;f__Kineosporiaceae;g__Kineosporia;	4.07963e-05	9.5888e-10	1.54829e-05	0	0	0	0.0136293	0.354266
k__Bacteria;p__Verrucomicrobia;c__Verrucomicrobiae;o__Methylacidiphilales;f__Methylacidiphilaceae;g__uncultured;	0	0	0	2.71976e-05	5.47931e-10	1.1704e-05	0.0259506	0.386015
k__Bacteria;p__Proteobacteria;c__Deltaproteobacteria;o__Myxococcales;f__BIrii41;g__metagenome;	3.17305e-05	9.5888e-10	1.54829e-05	0	0	0	0.0438175	0.462025
k__Bacteria;p__Actinobacteria;c__Actinobacteria;o__Micromonosporales;f__Micromonosporaceae;g__Dactylosporangium;	3.62634e-05	1.09586e-09	1.65519e-05	0	0	0	0.0348802	0.447004
k__Bacteria;p__Proteobacteria;c__Alphaproteobacteria;o__Caulobacterales;f__Hyphomonadaceae;g__Hyphomonas;	1.35988e-05	3.01362e-10	8.67989e-06	4.53293e-05	5.47931e-10	1.1704e-05	0.03623	0.449314
k__Bacteria;p__Actinobacteria;c__Actinobacteria;o__Micrococcales;f__Brevibacteriaceae;g__Brevibacterium;	1.35988e-05	7.39707e-10	1.35988e-05	4.98622e-05	8.21897e-11	4.53293e-06	0.0168688	0.354266
k__Bacteria;p__Firmicutes;c__Clostridia;o__Clostridiales;f__Lachnospiraceae;g__Anaerocolumna;	1.81317e-05	2.19173e-10	7.40224e-06	0	0	0	0.0199886	0.354266
k__Bacteria;p__Proteobacteria;c__Gammaproteobacteria;o__Gammaproteobacteria_Incertae_Sedis;f__Unknown_Family;g__uncultured;	3.17305e-05	7.39707e-10	1.35988e-05	0	0	0	0.0246654	0.386015
k__Bacteria;p__Actinobacteria;c__Actinobacteria;o__Corynebacteriales;f__Dietziaceae;g__Dietzia;	0	0	0	2.71976e-05	5.47931e-10	1.1704e-05	0.0259506	0.386015
k__Bacteria;p__Planctomycetes;c__Planctomycetacia;o__Pirellulales;f__Pirellulaceae;g__uncultured;	0	0	0	1.81317e-05	2.19173e-10	7.40224e-06	0.0199886	0.354266
k__Bacteria;p__Proteobacteria;c__Alphaproteobacteria;o__Azospirillales;f__Azospirillales_Incertae_Sedis;g__Stella;	0	0	0	2.26646e-05	3.01362e-10	8.67989e-06	0.0145095	0.354266
k__Bacteria;p__Bacteroidetes;c__Bacteroidia;o__Cytophagales;f__Spirosomaceae;g__Lacihabitans;	0	0	0	3.17305e-05	8.21897e-11	4.53293e-06	0.000319392	0.133027
k__Bacteria;p__Actinobacteria;c__Coriobacteriia;o__Coriobacteriales;f__Coriobacteriales_Incertae_Sedis;g__Raoultibacter;	0	0	0	1.81317e-05	2.19173e-10	7.40224e-06	0.0199886	0.354266
k__Bacteria;p__Proteobacteria;c__Gammaproteobacteria;o__Betaproteobacteriales;f__Rhodocyclaceae;g__uncultured;	0	0	0	1.81317e-05	2.19173e-10	7.40224e-06	0.0199886	0.354266
k__Bacteria;p__Chloroflexi;c__KD4-96;o__uncultured_Chloroflexi_bacterium;f__uncultured_Chloroflexi_bacterium;g__uncultured_Chloroflexi_bacterium;	2.26646e-05	3.01362e-10	8.67989e-06	0	0	0	0.0145095	0.354266

## Sheet: Supp Fig S1
Supplementary Figure S1. DNA quality control results of selected subjects before the intervention. A) Placebo group. B) Probiotic group

## Sheet: Supp Fig S2
Supplementary Figure S2. DNA quality control results of selected subjects after the intervention. A) Placebo group. B) Probiotic group
